# Supplementary material for: Effectiveness of a Three-Week Inpatient Pulmonary Rehabilitation Program for Patients after COVID-19: A Prospective Observational Study
Source: MDPI journal article supplement (doi:10.3390/ijerph18179001), 2021-08-26
Supplement: s1 [file s1]

## Supplemental material

**Table S1: Results of further patient-reported outcomes**

| Group                                                                         | T <sub>1</sub> |                        | T <sub>2</sub> |                        |                         |                         |                                                                                                                                       |
|-------------------------------------------------------------------------------|----------------|------------------------|----------------|------------------------|-------------------------|-------------------------|---------------------------------------------------------------------------------------------------------------------------------------|
|                                                                               | M<br>(Median)  | SD<br>(Range)          | M<br>(Median)  | SD<br>(Range)          | Delta<br>[95% CI]       | d<br>[95% CI]           | RM-ANOVA<br>F(df), p                                                                                                                  |
| Dyspnea                                                                       |                |                        |                |                        |                         |                         |                                                                                                                                       |
| NRS “How burdening or debilitating is your dyspnea at rest?” (☺ 0 – 10 ☹)     |                |                        |                |                        |                         |                         |                                                                                                                                       |
| All patients<br>N = 81                                                        | 2.01<br>(1.00) | 2.28<br>(0.00 – 10.00) | 0.95<br>(0.00) | 1.59<br>(0.00 – 9.00)  | -1.06<br>[-1.44; -0.68] | -0.62<br>[-0.86; -0.38] | F <sub>T</sub> = 24.4(1),<br>p < 0.001<br><br>F <sub>G</sub> = 4.54(2),<br>p = 0.013<br><br>F <sub>G·T</sub> = 0.601(2),<br>p = 0.551 |
| A<br>N = 43                                                                   | 1.56<br>(1.00) | 2.03<br>(0.00 – 8.00)  | 0.54<br>(0.00) | 0.83<br>(0.00 – 3.00)  | -1.02<br>[-1.54; -0.51] | -0.61<br>[-0.93; -0.28] |                                                                                                                                       |
| B<br>N = 23                                                                   | 2.26<br>(2.00) | 1.89<br>(0.00 – 6.00)  | 0.91<br>(1.00) | 1.24<br>(0.00 – 5.00)  | -1.35<br>[-2.16; -0.54] | -0.72<br>[-1.17; -0.25] |                                                                                                                                       |
| C<br>N = 15                                                                   | 2.93<br>(2.00) | 3.17<br>(0.00 – 10.00) | 2.20<br>(2.00) | 2.78<br>(0.00 – 9.00)  | -0.73<br>[-1.61; 0.14]  | -0.46<br>[-0.99; 0.08]  |                                                                                                                                       |
| NRS “How burdening or debilitating is your dyspnea on exertion?” (☺ 0 – 10 ☹) |                |                        |                |                        |                         |                         |                                                                                                                                       |
| All patients<br>N = 81                                                        | 6.03<br>(6.00) | 2.72<br>(0.00 – 10.00) | 3.91<br>(4.00) | 2.93<br>(0.00 – 10.00) | -2.11<br>[-2.70; -1.52] | -0.75<br>[-1.04; -0.54] | F <sub>T</sub> = 33.3(1),<br>p < 0.001<br><br>F <sub>G</sub> = 1.39(2),<br>p = 0.254<br><br>F <sub>G·T</sub> = 1.92(2),<br>p = 0.152  |
| A<br>N = 43                                                                   | 5.79<br>(6.00) | 2.77<br>(0.00 – 10.00) | 3.42<br>(3.00) | 2.58<br>(0.00 – 10.00) | -2.37<br>[-3.18; -1.57] | -0.90<br>[-1.25; -0.54] |                                                                                                                                       |
| B<br>N = 23                                                                   | 6.29<br>(6.00) | 2.44<br>(1.00 – 10.00) | 3.92<br>(3.00) | 3.06<br>(0.00 – 10.00) | -2.38<br>[-3.59; -1.16] | -0.83<br>[-1.29; -0.36] |                                                                                                                                       |
| C<br>N = 15                                                                   | 6.29<br>(6.50) | 3.17<br>(0.00 – 10.00) | 5.43<br>(6.00) | 3.37<br>(0.00 – 10.00) | -0.86<br>[-2.07; 0.36]  | -0.41<br>[-0.95; 0.15]  |                                                                                                                                       |
| Cough, sputum, and pain                                                       |                |                        |                |                        |                         |                         |                                                                                                                                       |
| NRS “How intense is your cough?” (☺ 0 – 10 ☹)                                 |                |                        |                |                        |                         |                         |                                                                                                                                       |
| All patients<br>N = 82                                                        | 1.92<br>(1.00) | 2.37<br>(0.00 – 10.00) | 1.05<br>(0.00) | 1.89<br>(0.00 – 10.00) | -0.87<br>[-1.31; -0.43] | -0.43<br>[-0.66; -0.21] | F <sub>T</sub> = 12.2(1),<br>p < 0.001<br><br>F <sub>G</sub> = 3.4(2),<br>p = 0.040                                                   |
| A<br>N = 43                                                                   | 1.81<br>(1.00) | 2.09<br>(0.00 – 7.00)  | 0.70<br>(0.00) | 0.89<br>(0.00 – 3.00)  | -1.12<br>[-1.65; -0.58] | -0.64<br>[-0.96; 0.31]  |                                                                                                                                       |
| B<br>N = 25                                                                   | 1.36<br>(0.00) | 1.98<br>(0.00 – 8.00)  | 1.08<br>(0.00) | 2.12<br>(0.00 – 7.00)  | -0.28<br>[-0.58; 0.21]  | -0.19<br>[-0.58; 0.21]  |                                                                                                                                       |

|                                                                          |                |                        |                |                        |                         |                         |                                                                                                                      |
|--------------------------------------------------------------------------|----------------|------------------------|----------------|------------------------|-------------------------|-------------------------|----------------------------------------------------------------------------------------------------------------------|
| C<br>N = 14                                                              | 3.21<br>(2.50) | 3.36<br>(0.00 – 10.00) | 2.07<br>(1.00) | 3.15<br>(0.00 – 10.00) | -1.14<br>[-2.97; 0.68]  | -0.36<br>[-0.90; 0.19]  | $F_{G^*T} = 1.57(2)$ ,<br>$p = 0.214$                                                                                |
| NRS “How big is the amount of phlegm that you expectorate?” (☹ 0 – 10 ☺) |                |                        |                |                        |                         |                         |                                                                                                                      |
| All patients<br>N = 81                                                   | 1.11<br>(0.00) | 1.80<br>(0.00 – 7.00)  | 0.58<br>(0.00) | 1.17<br>(0.00 – 5.00)  | -0.53<br>[-0.83; -0.23] | -0.40<br>[-0.62; -0.17] | $F_T = 12.6(1)$ ,<br>$p < 0.001$<br><br>$F_G = 1.4(2)$ ,<br>$p = 0.253$<br><br>$F_{G^*T} = 0.3(2)$ ,<br>$p = 0.738$  |
| A<br>N = 42                                                              | 0.91<br>(0.00) | 1.53<br>(0.00 – 5.00)  | 0.48<br>(0.00) | 0.86<br>(0.00 – 4.00)  | -0.43<br>[-0.86; 0.002] | -0.29<br>[-0.62; 0.001] |                                                                                                                      |
| B<br>N = 24                                                              | 1.08<br>(0.00) | 1.64<br>(0.00 – 6.00)  | 0.50<br>(0.00) | 1.18<br>(0.00 – 5.00)  | -0.58<br>[-0.11; -0.07] | -0.48<br>[-0.90; -0.05] |                                                                                                                      |
| C<br>N = 15                                                              | 1.73<br>(0.00) | 2.60<br>(0.00 – 7.00)  | 1.00<br>(0.00) | 1.77<br>(0.00 – 5.00)  | -0.73<br>[-1.56; 0.38]  | -0.49<br>[-1.02; 0.05]  |                                                                                                                      |
| NRS “How strong is the pain that you experience?” (☹ 0 – 10 ☺)           |                |                        |                |                        |                         |                         |                                                                                                                      |
| All patients<br>N = 83                                                   | 3.46<br>(3.00) | 2.91<br>(0.00 – 10.00) | 2.70<br>(2.00) | 2.68<br>(0.00 – 9.00)  | -0.76<br>[-1.33; -0.19] | -0.27<br>[-0.51; -0.07] | $F_T = 6.27(1)$ ,<br>$p = 0.014$<br><br>$F_G = 8.64(2)$ ,<br>$p < 0.001$<br><br>$F_{G^*T} = 0.3(2)$ ,<br>$p = 0.733$ |
| A<br>N = 44                                                              | 2.55<br>(2.00) | 2.58<br>(0.00 – 10.00) | 1.75<br>(1.00) | 2.11<br>(0.00 – 8.00)  | -0.80<br>[-1.62; 0.03]  | -0.29<br>[-0.59; 0.01]  |                                                                                                                      |
| B<br>N = 24                                                              | 4.00<br>(4.0)  | 2.83<br>(0.00 – 10.00) | 3.54<br>(4.00) | 2.75<br>(0.00 – 9.00)  | -0.46<br>[-1.49; 0.58]  | -0.19<br>[-0.59; -0.22] |                                                                                                                      |
| C<br>N = 15                                                              | 5.27<br>(6.00) | 3.06<br>(0.00 – 9.00)  | 4.13<br>(4.00) | 3.09<br>(0.00 – 9.00)  | -1.13<br>[-2.61; 0.34]  | -0.43<br>[-0.95; 0.11]  |                                                                                                                      |

Notes: NRS: Numeric Rating Scale; T<sub>1</sub>: start of rehabilitation; T<sub>2</sub>: end of rehabilitation; M: mean; SD: standard deviation; Delta: difference M<sub>T2</sub> – M<sub>T1</sub>; 95% CI: 95%

confidence interval; d: Cohen’s d; RM-ANOVA: repeated-measures analysis of variance; F<sub>T</sub>: F-value for factor “Time” (T<sub>1</sub> versus T<sub>2</sub>); F<sub>G</sub>: F value for factor “Group”

(A versus B versus C); F<sub>G^\*T</sub>: F value for interaction of “Time” and “Group”

**Table S2: Additional results of pulmonary function, and laboratory blood tests**

| Group                                       | T <sub>1</sub>   |                        | T <sub>2</sub>   |                        |                        |                         |                                                                                       |
|---------------------------------------------|------------------|------------------------|------------------|------------------------|------------------------|-------------------------|---------------------------------------------------------------------------------------|
|                                             | M<br>(Median)    | SD<br>(Range)          | M<br>(Median)    | SD<br>(Range)          | Delta<br>[95% CI]      | d<br>[95% CI]           | RM-ANOVA<br>F(df), p                                                                  |
| Lung function parameters                    |                  |                        |                  |                        |                        |                         |                                                                                       |
| FEV1/VC [%]                                 |                  |                        |                  |                        |                        |                         |                                                                                       |
| All patients<br>N = 103                     | 81.5<br>(82.6)   | 10.4<br>(45.4 – 123.9) | 81.3<br>(82.8)   | 8.2<br>(39.4 – 107.6)  | -0.2<br>[-2.4; 2.1]    | -0.01<br>[-0.2; 1.7]    | F <sub>T</sub> = 0.2(1),<br>p = 0.689<br><br>F <sub>G</sub> = 0.3(2),<br>p = 0.721    |
| A<br>N = 54                                 | 82.3<br>(83.2)   | 12.2<br>(45.4 – 123.9) | 81.3<br>(83.1)   | 8.99<br>(39.4 – 107.6) | -1.0<br>[-5.0; 2.9]    | -0.07<br>[-0.33; 0.19]  |                                                                                       |
| B<br>N = 32                                 | 80.6<br>(82.1)   | 8.7<br>(56.9 – 98.1)   | 80.4<br>(81.1)   | 7.8<br>(62.4 – 93.8)   | -0.3<br>[-2.6; 2.1]    | -0.04<br>[0.39; -0.31]  |                                                                                       |
| C<br>N = 17                                 | 80.4<br>(81.4)   | 6.0<br>(66.9 – 88.1)   | 83.1<br>(84.2)   | 6.0<br>(71.9 – 94.7)   | 2.8<br>[0.06; 5.5]     | 0.53<br>[0.01; 1.03]    | F <sub>G+T</sub> = 0.7(2),<br>p = 0.481                                               |
| Specific airway resistance (sRtot) [%pred.] |                  |                        |                  |                        |                        |                         |                                                                                       |
| All patients<br>N=103                       | 89.70<br>(76.7)  | 60.0<br>(39.6 – 600.9) | 81.0<br>(76.7)   | 29.2<br>(44.2 – 249.1) | -8.7<br>[-6.3; 3.7]    | -0.14<br>[-0.33; 0.06]  | F <sub>T</sub> = 1.2(1),<br>p = 0.267<br><br>F <sub>G</sub> = 0.6(2),<br>p = 0.528    |
| A<br>N=54                                   | 89.1<br>(74.9)   | 78.7<br>(39.7 – 600.9) | 74.8<br>(70.8)   | 30.7<br>(44.2 – 249.1) | -14.2<br>[-37.0; 8.6]  | -0.17<br>[-0.43; 0.10]  |                                                                                       |
| B<br>N=32                                   | 89.9<br>(84.0)   | 30.7<br>(46.9 – 171.5) | 91.7<br>(85.9)   | 26.3<br>(54.7 – 148.3) | 1.77<br>[-9.4; 13.0]   | 0.06<br>[-0.29; 0.40]   |                                                                                       |
| C<br>N=17                                   | 91.3<br>(90.5)   | 25.6<br>(39.6 – 139.2) | 80.3<br>(82.8)   | 24.8<br>(50.5 – 131.1) | -11.0<br>[-21.2; -0.7] | -0.55<br>[-1.05; -0.03] | F <sub>G+T</sub> = 0.6(2),<br>p = 0.526                                               |
| Residual volume (RV) [%pred.]               |                  |                        |                  |                        |                        |                         |                                                                                       |
| All patients<br>N = 103                     | 103.3<br>(102.8) | 27.4<br>(29.5 – 185.2) | 103.0<br>(102.0) | 25.4<br>(44.5 – 176.6) | -0.28<br>[-5.8; 5.2]   | -0.01<br>[-0.20; 0.18]  | F <sub>T</sub> < 0.001(1),<br>p = 0.9999<br><br>F <sub>G</sub> = 6.3(2),<br>p = 0.002 |
| A<br>N = 54                                 | 97.2<br>(97.3)   | 27.1<br>(55.6 – 185.2) | 95.0<br>(96.4)   | 23.4<br>(44.5 – 143.5) | -2.2<br>[-10.5; 6.1]   | -0.07<br>[-0.34; 0.19]  |                                                                                       |
| B<br>N = 32                                 | 109.4<br>(104.7) | 24.1<br>(73.8 – 172.9) | 112.8<br>(110.5) | 26.1<br>(72.8 – 176.6) | 3.4<br>[-5.6; 12.3]    | 0.14<br>[-0.21; 0.48]   |                                                                                       |
| C<br>N = 17                                 | 111.4<br>(111.5) | 30.9<br>(29.5 – 182.6) | 110.2<br>(105.0) | 22.8<br>(62.7 – 157.1) | -1.2<br>[-15.8; 13.3]  | 0.04<br>[-0.52; 0.43]   | F <sub>G+T</sub> = 0.4(2),<br>p = 0.675                                               |
| Partial pressure of CO2 (PaCO2) [mm Hg]     |                  |                        |                  |                        |                        |                         |                                                                                       |
| All patients<br>N = 100                     | 36.2<br>(36.0)   | 3.1<br>(26.0 – 43.0)   | 36.0<br>(36.0)   | 3.2<br>(28.0 – 43.0)   | -0.1<br>[-0.7; 0.4]    | -0.06<br>[-0.25; 0.14]  | F <sub>T</sub> = 0.4(1),<br>p = 0.549                                                 |

|                                                                   |                  |                           |                  |                           |                          |                         |                                                                                                                                     |
|-------------------------------------------------------------------|------------------|---------------------------|------------------|---------------------------|--------------------------|-------------------------|-------------------------------------------------------------------------------------------------------------------------------------|
| A<br>N=51                                                         | 36.2<br>(36.0)   | 3.0<br>(28.0 – 43.0)      | 36.3 (37.0)      | 3.3<br>(29.0 – 43.0)      | 0.1<br>[-0.7; 1.0]       | 0.05<br>[-0.23; 0.32]   | F <sub>G</sub> = 0.67(2),<br>p = 0.516<br><br>F <sub>G+T</sub> = 1.2(2),<br>p = 0.313                                               |
| B<br>N = 31                                                       | 36.1<br>(36.00)  | 2.4<br>(31.0 – 40.0)      | 35.3 (36.0)      | 2.8<br>(30.0 – 40.0)      | -0.8<br>[-1.7; 0.1]      | -0.32<br>[-0.68; 0.04]  |                                                                                                                                     |
| C<br>N = 18                                                       | 36.5<br>(37.5)   | 4.2<br>(26.0 – 43.0)      | 36.6<br>(36.5)   | 3.7<br>(28.0 – 43.0)      | 0.11<br>[-1.4; 1.6]      | 0.03<br>[-0.43; 0.50]   |                                                                                                                                     |
| Laboratory blood test                                             |                  |                           |                  |                           |                          |                         |                                                                                                                                     |
| Lactate dehydrogenase (LDH) [U/l] (Normal value 120 - 240 U/l)    |                  |                           |                  |                           |                          |                         |                                                                                                                                     |
| All patients<br>N=56                                              | 195.8<br>(193.5) | 45.6<br>(100.0 – 327.0)   | 191.8<br>(189.0) | 36.3<br>(110.0 – 285.0)   | -4.1<br>[-11.9; 3.8]     | -0.14<br>[-0.40; 0.12]  | F <sub>T</sub> = 0.7(1),<br>p = 0.406                                                                                               |
| A<br>N=30                                                         | 202.2<br>(194.0) | 51.0<br>(121.00 – 327.00) | 198.1<br>(198.0) | 36.5<br>(122.00 – 285.00) | -4.1<br>[-16.9; 8.7]     | -0.12<br>[-0.48; 0.24]  | F <sub>G</sub> = 1.1(2),<br>p = 0.335<br><br>F <sub>G+T</sub> = 0.02(2),<br>p = 0.972                                               |
| B<br>N=17                                                         | 185.2<br>(190.0) | 35.7<br>(100.00 – 250.00) | 180.2<br>(178.0) | 35.1<br>(110.0 – 247.0)   | -5.0<br>[-17.2; 7.2]     | -0.21<br>[-0.69; 0.27]  |                                                                                                                                     |
| Brain natriuretic peptide (BNP) [pg/ml] (Normal value <125 pg/ml) |                  |                           |                  |                           |                          |                         |                                                                                                                                     |
| All<br>N=61                                                       | 203.3<br>(100)   | 411.2<br>(35.0 – 2940.0)  | 174.9<br>(83.0)  | 393.8<br>(35.0 – 2760.0)  | -28.4<br>[-100.1; -43.2] | -0.10<br>[-0.35; -0.15] | F <sub>T</sub> = 0.23(1),<br>p = 0.632<br><br>F <sub>G</sub> = 0.21(2),<br>p = 0.81<br><br>F <sub>G+T</sub> = 2.46(2),<br>p = 0.094 |
| A<br>N=32                                                         | 314.1<br>(119.0) | 546.9<br>(35.00 – 2940.0) | 263.4<br>(114.5) | 530.7<br>(35.0 – 2760.0)  | -50.7<br>[-190.2; -88.8] | -0.13<br>[-0.48; 0.22]  |                                                                                                                                     |
| B<br>N=18                                                         | 78.7<br>(83.00)  | 31.7<br>(35.0 – 120.0)    | 73.50<br>(81.0)  | 34.8<br>(35.0 – 145.0)    | -5.22<br>[-20.4; 10.0]   | -0.17<br>[0.63; -0.30]  |                                                                                                                                     |
| C<br>N=11                                                         | 84.7<br>(92.0)   | 54.0<br>(35.0 – 181.0)    | 83.1<br>(82.0)   | 48.8<br>(35.0 – 183.0)    | -1.6<br>[-22.7; 19.4]    | 0.05<br>[-0.64; 0.54]   |                                                                                                                                     |
| C<br>N = 9                                                        | 194.8<br>(195.0) | 44.3<br>(137.0 – 280.0)   | 192.7<br>(184.0) | 36.3<br>(150.0 – 269.0)   | -2.11<br>[-18.5; 14.2]   | -0.10<br>[-0.75; 0.55]  |                                                                                                                                     |

Notes: T<sub>1</sub>: start of rehabilitation; T<sub>2</sub>: end of rehabilitation; M: mean; SD: standard deviation; Delta: difference M<sub>T2</sub> – M<sub>T1</sub>; 95% CI: 95% confidence interval; d: Cohen's d; RM-ANOVA: repeated-measures analysis of variance; F<sub>T</sub>: F-value for factor "Time" (T<sub>1</sub> versus T<sub>2</sub>); F<sub>G</sub>: F value for factor "Group" (A versus B versus C); F<sub>G\*T</sub>: F value for interaction of "Time" and "Group"
